# Supplementary material
Source: publisher figshare collection journal article supplement (https://gsajournals.figshare.com/ndownloader/files/28102746)
Supplement: Supplementary file 1 [file 28102746]

## Sheet: Table S7
Table S7. Joint-linkage QTL support intervals (SI) of elemental phenotypes analyzed in the maize NAM panel (Ziegler et al. 2017) uplifted from B73 RefGen_v2 to v4.
Phenotype	NAM QTL number	Peak marker chr v2	Peak marker pos v2 (bp)	Peak marker chr v4	Peak marker pos v4 (bp)	Left SI chr v4	Left SI pos v4 (bp)	Right SI chr v4	Right SI pos v4 (bp)
Boron	B-1	1	225049713	1	228619892	1	227692073	1	229419828
Boron	B-2	3	130307198	3	130135893	3	129429787	3	136598908
Boron	B-3	4	65958274	4	68411701	4	49469822	4	85967609
Calcium	Ca-1	1	25635502	1	25931150	1	301182180	1	27202469
Calcium	Ca-2	3	167010262	3	169650879	3	171734764	3	171734764
Calcium	Ca-3	4	22871645	4	23914920	4	21175683	4	25853963
Calcium	Ca-4	5	64119272	5	66026569	5	65037672	5	67769768
Calcium	Ca-5	5	196670597	5	201868522	5	191893867	5	208986916
Calcium	Ca-6	8	105310861	8	107301343	8	104929020	8	109688767
Calcium	Ca-7	9	136848569	9	139376578	9	139148458	9	139670908
Calcium	Ca-8	10	12449107	10	12463398	10	11727904	10	12810956
Cadmium	Cd-1	2	162947334	2	167612588	2	161364495	2	168823230
Copper	Cu-1	2	60834813	2	62563961	2	59674224	2	81133050
Copper	Cu-2	2	187941351	2	193541186	2	192627479	2	194070805
Copper	Cu-3	4	82893043	4	85967609	4	61318291	4	128883494
Copper	Cu-4	5	69574110	5	71527996	5	69273431	5	76363049
Copper	Cu-5	8	14271375	8	14668413	8	14450640	8	14876401
Copper	Cu-6	8	135827760	8	139792962	8	133037197	8	143509272
Copper	Cu-7	9	140970753	9	143659969	9	143072052	9	145447087
Copper	Cu-8	10	140192713	10	140872432	10	140139062	10	142104922
Iron	Fe-1	1	185859799	1	187896521	1	187278084	1	190300683
Iron	Fe-2	1	263200803	1	268074970	1	263672418	1	268574248
Iron	Fe-3	2	23285746	2	24490351	2	23781151	2	29277368
Iron	Fe-4	3	138184194	3	138892437	3	130135893	3	147865755
Iron	Fe-5	3	208958646	3	212413372	3	212413372	3	213346265
Iron	Fe-6	4	177166788	4	174929950	4	178520954	4	181725220
Iron	Fe-7	5	64119272	5	66026569	5	63890679	5	77092963
Iron	Fe-8	6	84787343	6	87899050	6	85388415	6	91590719
Iron	Fe-9	6	131416690	6	135484589	6	133827534	6	136332061
Iron	Fe-10	7	4891872	7	5145462	7	4246333	7	5928090
Iron	Fe-11	7	140778553	7	145399183	7	145157776	7	145914696
Iron	Fe-12	7	161890276	7	179777968	7	43195496	7	30507588
Iron	Fe-13	7	174337465	7	171166681	7	179777968	7	179968950
Iron	Fe-14	8	165926319	8	149619873	8	171008943	8	171227770
Nickel	Ni-1	1	246644977	1	250281647	1	248102464	1	253271548
Nickel	Ni-2	2	188258342	2	193686687	2	193541186	2	194070805
Nickel	Ni-3	3	170550176	3	173186011	3	172034624	3	173907981
Nickel	Ni-4	6	147810769	6	151870918	6	145181585	6	153171004
Nickel	Ni-5	9	2194925	9	1872121	9	1813157	9	2000545
Zinc	Zn-1	1	66429994	1	67189031	1	66120414	1	72807191
Zinc	Zn-2	1	253198898	1	257657139	1	257265642	1	258840742
Zinc	Zn-3	3	208861530	3	212413372	3	209605120	3	212746033
Zinc	Zn-4	4	201232037	4	205686824	4	203771626	4	213267587
Zinc	Zn-5	5	190561818	5	195721462	5	195195087	5	196068718
Zinc	Zn-6	6	32190999	6	33650730	6	30955978	6	40027683
Zinc	Zn-7	7	174759613	7	180322257	7	179777968	7	180924771
Zinc	Zn-8	9	24400853	9	24342405	9	23768066	9	24686535
Zinc	Zn-9	10	127303531	10	128334488	10	113898315	10	132776717
Potassium	K-1	1	100131217	1	96085191	1	102502686	1	115426747
Potassium	K-2	4	65958274	4	61318291	4	68411701	4	71477973
Potassium	K-3	4	225665119	4	228877312	4	230611999	4	234197954
Potassium	K-4	8	147848763	8	150845882	8	152261644	8	157442561
Potassium	K-5	9	97828232	9	94362502	9	100932844	9	106559298
Magnesium	Mg-1	1	66916775	1	61334173	1	68725680	1	78564935
Magnesium	Mg-2	1	269068613	1	273544854	1	273662767	1	276496052
Magnesium	Mg-3	3	135907308	3	132285783	3	136598908	3	140840283
Magnesium	Mg-4	5	14659141	5	13594771	5	15081261	5	15421699
Magnesium	Mg-5	5	197181836	5	201868522	5	201995155	5	202963615
Magnesium	Mg-6	6	24315212	6	20598064	6	22467907	6	27136760
Magnesium	Mg-7	6	162078800	6	166150357	6	166251598	6	166649085
Magnesium	Mg-8	7	166160181	7	166160848	7	171735808	7	171867333
Magnesium	Mg-9	8	104670301	8	104160892	8	106973211	8	124833043
Magnesium	Mg-10	9	97193014	9	99954024	9	100609132	9	103268146
Magnesium	Mg-11	9	149427536	9	152247239	9	152534546	9	152681979
Manganese	Mn-1	1	38084435	1	34024954	1	38480254	1	41057661
Manganese	Mn-2	1	162922240	1	162457841	1	164575367	1	166477376
Manganese	Mn-3	1	256513832	1	259906710	1	261077385	1	261791682
Manganese	Mn-4	3	22939492	3	21460584	3	22405834	3	22722410
Manganese	Mn-5	3	61454743	3	53777483	3	58289386	3	102344001
Manganese	Mn-6	3	181581888	3	183972295	3	184503746	3	184947964
Manganese	Mn-7	3	192069585	3	194380276	3	194835733	3	198285427
Manganese	Mn-8	4	82893043	4	84167309	4	85967609	4	95240143
Manganese	Mn-9	5	155482552	5	153902942	5	158627546	5	162431506
Manganese	Mn-10	7	14369495	7	9485274	7	14779346	7	26602502
Manganese	Mn-11	7	159177821	7	164245174	7	164508224	7	164690240
Manganese	Mn-12	8	132405651	8	128420026	8	135656398	8	136860593
Manganese	Mn-13	8	171809448	8	176828144	8	177088905	8	178171767
Manganese	Mn-14	9	106344210	9	109215295	9	32230190	9	110229263
Manganese	Mn-15	9	136737424	9	138531943	9	139253901	9	141079995
Manganese	Mn-16	10	78533820	10	74057714	10	77949017	10	85471303
Manganese	Mn-17	10	141761729	10	142406188	10	142540263	10	142619465
Molybdenum	Mo-1	1	27285333	1	301182180	1	27481801	1	28708925
Molybdenum	Mo-2	1	245060731	1	247536419	1	248102464	1	249474858
Molybdenum	Mo-3	2	2474863	2	2350674	2	2488641	2	2802348
Molybdenum	Mo-4	3	44223736	3	28716308	3	43702295	3	48943668
Molybdenum	Mo-5	3	190491962	3	190815515	3	193442918	3	194380276
Molybdenum	Mo-6	3	214568867	3	217233832	3	70110100	3	218606034
Molybdenum	Mo-7	4	41538292	4	38941096	4	43284309	4	45022243
Molybdenum	Mo-8	7	137555430	7	141863600	7	140466129	7	143553291
Molybdenum	Mo-9	7	160023761	7	164508224	7	165496626	7	167029398
Molybdenum	Mo-10	8	18215366	8	17680322	8	18839390	8	18982374
Phosphorus	P-1	1	62173878	1	61334173	1	62971371	1	65855131
Phosphorus	P-2	1	268306072	1	272477684	1	273048923	1	275689562
Phosphorus	P-3	4	41538292	4	41619424	4	43284309	4	45022243
Phosphorus	P-4	4	173614056	4	175713463	4	176585924	4	177083746
Phosphorus	P-5	4	211278493	4	214130421	4	214690327	4	223580122
Phosphorus	P-6	5	189526035	5	194003306	5	194603880	5	199540890
Phosphorus	P-7	8	141038764	8	136860593	8	145200885	8	149990502
Phosphorus	P-8	10	130378094	10	126401149	10	131517723	10	131707993
Rubidium	Rb-1	1	67403556	1	68725680	1	68499431	1	69938504
Rubidium	Rb-2	4	103600817	4	95240143	4	101327228	4	148150198
Rubidium	Rb-3	5	200799835	5	204691785	5	206273925	5	208370024
Strontium	Sr-1	1	60947481	1	61334173	1	61334173	1	65079195
Strontium	Sr-2	3	154792291	3	142868558	3	156217453	3	158423748
Strontium	Sr-3	10	12449107	10	10100715	10	12463398	10	12810956
Calcium	Not upliftable	6	10683511	2	157590547	6	6642740	6	24672902
Calcium	Not upliftable	6	164209118	6	168367238	6	168660976	1	13068510
Calcium	Not upliftable	9	18910882	9	18788689	9	17523246	B73V4_ctg129	19931
Iron	Not upliftable	5	159288407	5	163057569	B73V4_ctg28	9908	B73V4_ctg28	9908
Iron	Not upliftable	10	148843655	10	149619873	B73V4_ctg149	26914	10	149376547
Nickel	Not upliftable	2	87089680	2	89423529	B73V4_ctg56	134017	2	66717046
Magnesium	Not upliftable	4	224493236	4	228234068	4	228877312	1	18619841
Molybdenum	Not upliftable	5	174939772	5	178526007	1	183204713	5	179164184
Molybdenum	Not upliftable	6	148119600	4	231301222	6	152141109	6	153788040
Phosphorus	Not upliftable	2	29409244	1	98861035	2	30801785	2	31832240
Phosphorus	Not upliftable	9	20223300	9	20101682	B73V4_ctg129	186544	B73V4_ctg129	19931
Phosphorus	Not upliftable	9	114729542	9	113965777	1	260898344	B73V4_ctg181	198266
Rubidium	Not upliftable	1	25257207	1	25446185	1	301182180	10	36355350
